# Supplementary material for: The oxygen reduction reaction of two electron transfer of nitrogen-doped carbon in the electro-Fenton system
Source: Royal Society of Chemistry journal article supplement (doi:10.1039/d0nj03298k), 2020-01-01
Supplement: d0nj03298k1.pdf [file d0nj03298k1.pdf]

Electronic Supplementary Material(ESI) for New Journal of Chemistry  
 Supporting Information

The oxygen reduction reaction of two electron transfer of nitrogen doped carbon in  
 the electro Fenton system

Jiayi Feng<sup>ab</sup>, and Yonggang Zhang<sup>\*ab</sup>

<sup>a</sup> State Key Laboratory of Separation Membranes and Membrane Processes, Tiangong University,  
 Tianjin 300387, China.

<sup>b</sup> School of Environmental Science and Engineering, Tiangong University, Tianjin 300387, China.

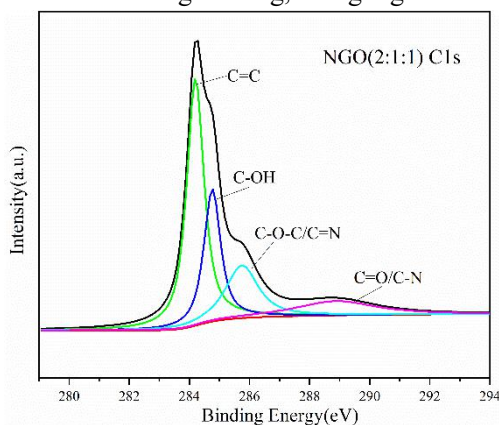

FigS1. XPS high-resolution C1s spectra of NGO(2:1:1)

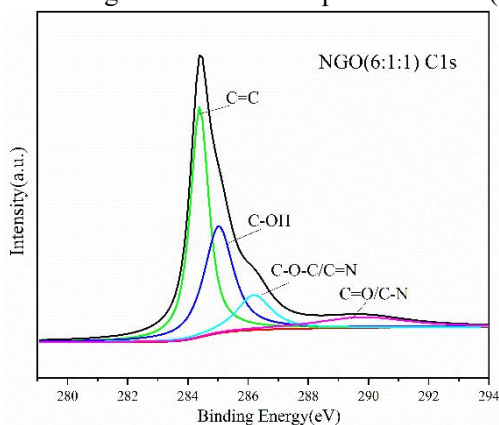

FigS2. XPS high-resolution C1s spectra of NGO(6:1:1)

| Sample     | C1s(%) | O1s(%) | N1s(%)      |            |            | C/O   |
|------------|--------|--------|-------------|------------|------------|-------|
|            |        |        | Pyridinic N | Pyrrolic N | Graphite N |       |
| GO         | 64.94  | 35.06  | -           | -          | -          | 1.85  |
| NGO(2:1:1) | 93.70  | 4.67   | 40.90       | 27.90      | 31.20      | 20.06 |
| NGO(4:1:1) | 94.65  | 2.64   | 35.50       | 24.60      | 39.90      | 35.85 |
| NGO(6:1:1) | 94.70  | 2.69   | 42.80       | 22.70      | 34.50      | 35.20 |

TableS1. Atomic percentage in the catalyst of GO and NGO.

\*Corresponding Author: Yonggang Zhang

E-mail address: [Zhangyonggang1895@163.com](mailto:Zhangyonggang1895@163.com) (Y. Zhang)
